# Supplementary material
Source: PubMed Central journal article supplement (PMC7904241)

**Online Supporting Information**  
**for**  
**“Mitochondrial Transcription Factor A Binds to and Promotes Mutagenic Transcriptional Bypass of  $O^4$ -Alkylthymidine Lesions”**

Xiaomei He, Pengcheng Wang and Yinsheng Wang\*

Department of Chemistry, University of California Riverside, CA 92521-0403, USA

\*To whom correspondence should be addressed: yinsheng.wang@ucr.edu

**Table of Contents**

|                                                                                                                                                                                                                                        |               |
|----------------------------------------------------------------------------------------------------------------------------------------------------------------------------------------------------------------------------------------|---------------|
| <b>Supplementary Experimental Conditions</b>                                                                                                                                                                                           | <b>S3-S5</b>  |
| <b>Table S1.</b> A list of candidate $O^2$ - <i>n</i> BudT-binding proteins identified from SILAC-based quantitative proteomic experiments                                                                                             | <b>S6-S7</b>  |
| <b>Table S2.</b> A list of candidate $O^4$ - <i>n</i> BudT-binding proteins.                                                                                                                                                           | <b>S8-S11</b> |
| <b>Figure S1.</b> Negative-ion ESI-MS and MS/MS for the characterizations of d(ATGGCGXGCTATGATCCTAT), X = $O^2$ - <i>n</i> BudT.                                                                                                       | <b>S12</b>    |
| <b>Figure S2.</b> Negative-ion ESI-MS and MS/MS for the characterizations of d(ATGGCGXGCTATGATCCTAT), X = $O^2$ - <i>n</i> BudT.                                                                                                       | <b>S13</b>    |
| <b>Figure S3.</b> Negative-ion ESI-MS and MS/MS for the characterizations of d(ATGGCGXGCTATGATCCTAT), X = $O^4$ -POBdT                                                                                                                 | <b>S14</b>    |
| <b>Figure S4.</b> Representative PAGE gel image for assessing the purity of the synthesized oligodeoxyribonucleotides.                                                                                                                 | <b>S15</b>    |
| <b>Figure S5.</b> A scatter plot showing the proteins identified from pull-down assays using $O^2$ - <i>n</i> BudT-containing DNA relative to the corresponding lesion-free DNA with nuclear protein lysates isolated from HeLa cells. | <b>S16</b>    |
| <b>Figure S6.</b> ESI-MS/MS of the [M + 2H] <sup>2+</sup> ions of light (a) and heavy (b) arginine-containing peptide, EMLGGEIIPR, derived from DDB1.                                                                                  | <b>S17</b>    |
| <b>Figure S7.</b> ESI-MS/MS of the [M + 2H] <sup>2+</sup> ions of light (a) and heavy (b) lysine-containing peptide, FNPLNTNQFYASSMEGTTR, derived from DDB2.                                                                           | <b>S18</b>    |
| <b>Figure S8.</b> ESI-MS/MS of the [M + 2H] <sup>2+</sup> ions of light (a) and heavy (b) lysine-containing peptide, FKEQLTPSQIMSLEK, derived from TFAM.                                                                               | <b>S19</b>    |
| <b>Figure S9.</b> Representative ESI-MS (a, b) and ESI-MS/MS (c, d) of the [M + 2H] <sup>2+</sup> ions of light and heavy arginine-containing peptide, AEWQVYKEEISR, derived from TFAM.                                                | <b>S20</b>    |

|                                                                                                                                                                                                                                                                                               |            |
|-----------------------------------------------------------------------------------------------------------------------------------------------------------------------------------------------------------------------------------------------------------------------------------------------|------------|
| <b>Figure S10.</b> SDS-PAGE for monitoring the purification of recombinant full-length TFAM protein.                                                                                                                                                                                          | <b>S21</b> |
| <b>Figure S11.</b> (a) A schematic diagram illustrating the domain structure of TFAM protein. (b) SDS-PAGE gel for monitoring the purifications of truncated forms of recombinant TFAM protein that contain only the HMG-box A or HMG-box B domains (i.e. TFAM-HMG-box A and TFAM-HMG-box B). | <b>S22</b> |
| <b>Figure S12.</b> EMSA for measuring the binding affinities of HMG-box A (a) and HMG-box B (b) domains of TFAM with lesion-free and $O^4$ -alkyl dT DNA probes ( $n = 3$ ). Error bars represent S. D.                                                                                       | <b>S23</b> |
| <b>Figure S13.</b> Representative ESI-MS results showing the detection of the $[M-3H]^{3-}$ ions of restriction fragments of interest arising from the hRNAPII-mediated transcription of $O^2$ - <i>n</i> BudT- (a, b), $O^4$ - <i>n</i> BudT- (c) or $O^4$ -POBdT-bearing substrates (d).    | <b>S24</b> |
| <b>Figure S14.</b> Representative ESI-MS/MS for monitoring the 13-mer restriction fragments of interest with A→U, A→G or A→C mutation opposite the original lesion sites.                                                                                                                     | <b>S25</b> |
| <b>Figure S15.</b> Restriction digestion and post-labeling method for determining the bypass efficiencies and mutation frequencies of $O^2$ - <i>n</i> BudT, $O^4$ - <i>n</i> BudT and $O^4$ -POBdT in HeLa cells.                                                                            | <b>S26</b> |
| <b>Figure S16.</b> Representative ESI-MS results showing the detection of the $[M-3H]^{3-}$ ions of restriction fragments of interest arising from <i>in vivo</i> transcription of $O^2$ - <i>n</i> BudT- (a), $O^4$ - <i>n</i> BudT- (b) or $O^4$ -POBdT-bearing substrates (c).             | <b>S27</b> |

## **Supplementary Experimental Conditions**

### **Data Analysis**

The above LC-MS/MS data were searched using Maxquant (Version 1.2.2.5)<sup>1</sup> against UniProt human proteome database (UP000005640), to which contaminants and reverse sequences were added. The maximum number of missed cleavages for trypsin was two per peptide. Cysteine carbamidomethylation and methionine oxidation were set as fixed and variable modifications, respectively. MaxQuant multiplicity was set to 2, and [<sup>13</sup>C<sub>6</sub>]-L-arginine and [<sup>13</sup>C<sub>6</sub>,<sup>15</sup>N<sub>2</sub>]-L-lysine were selected as heavy amino acids. The search was performed with the tolerances in mass accuracy of 10 ppm and 20 ppm for MS and MS/MS, respectively. The required false-positive discovery rate was set at 1% at both the peptide and protein levels, with the minimal required peptide length being 6 amino acids. The match between runs option was used, with the alignment window and minimum protein ratio counts being 5 min and 1.0, respectively.

### **Western Blot**

Protein samples were separated on a 10% SDS-PAGE gel and transferred to a nitrocellulose membrane (Bio-Rad). After blocking with blotting-grade blocker (Bio-Rad), the membrane was incubated in PBS-T buffer (PBS with 0.1% Tween 20) containing primary antibody and 5% BSA for 2 h, and then incubated with the HRP-conjugated secondary antibody in a 5% blotting-grade blocker. After thorough washing of the membrane with PBS-T, the signal was detected with ECL Western blotting detection reagent (Amersham). Primary antibodies used in this study included DDB1 (Santa Cruz Biotechnology, sc-376860; 1:1000), DDB2 (Santa Cruz Biotechnology, sc-81246; 1:1000), TFAM (Santa Cruz Biotechnology, sc-376672; 1:1000) and HMGB2 (Santa Cruz

Biotechnology, sc-271689; 1:1000).

### **Generation of Recombinant TFAM Proteins**

The construct for producing recombinant GST-His-TFAM was prepared by PCR amplification of the *TFAM* gene from a cDNA library with primers containing BamHI and XhoI restriction recognition sites. The digested PCR product was ligated into pGEX-4T1 vector and the successful incorporation of the TFAM coding sequence was confirmed by Sanger sequencing. For truncated TFAM proteins, the corresponding coding sequences (i.e. HMG-box A: 43-118 aa; HMG-box B: 150-219 aa) were amplified by PCR and inserted into the pGEX-4T1 vector using the same method.

The pGEX-TFAM plasmid was transformed into competent Rosetta (DE3) pLysS *Escherichia coli* cells and TFAM expression was induced by 1 mM isopropyl 1-thio- $\beta$ -D-galactopyranoside (IPTG, Sigma) at 37°C for 4 h. The cells were subsequently harvested by centrifugation. The cell pellets were then lysed by sonication in a 10-mL buffer containing 50 mM Tris (pH 7.5), 0.5 M NaCl, 10% (v/v) glycerol, a protease inhibitor cocktail (Roche), and 1 mM phenylmethylsulfonyl fluoride (PMSF, Sigma). The cell lysate was then centrifuged at 10,000 g for 15 min. The recombinant proteins were purified by using Glutathione Superflow Agarose (Pierce) and, if needed, purified again using TALON Metal Affinity Resin. The purities of the resulting proteins were confirmed by SDS-PAGE analyses, and their quantities determined by Quick Start Bradford Protein Assay kit (Bio-Rad). The proteins were used immediately or stored at -80°C until use.

### **Electrophoretic Mobility Shift Assay (EMSA)**

EMSA was performed using a previously reported method with some modifications.<sup>2</sup> Briefly, various amounts of purified GST-TFAM were incubated with 10 fmol <sup>32</sup>P-labeled control or

lesion-containing 20-mer DNA substrates in a buffer containing 10 mM Tris-HCl (pH 7.5), 100 mM KCl, 1 mM EDTA, 0.1 mM DTT, 10 µg/mL BSA, and 10% glycerol. The mixtures were incubated at room temperature for 30 min and then resolved at 4°C on an 8% native polyacrylamide gel containing 40 mM Tris-acetate (pH 8.0) and 2 mM EDTA. Electrophoresis was performed at 200 V for 50 min and the labeled DNA probes and their protein-bound complexes were detected using a Typhoon PhosphorImager (GE). The data were processed using ImageJ (NIH). The  $K_d$  values were calculated using GraphPad Prism 5 with non-linear regression for curve fitting using a one-binding-site model.

#### **References:**

1. Cox, J.; Mann, M., MaxQuant enables high peptide identification rates, individualized p.p.b.-range mass accuracies and proteome-wide protein quantification. *Nat. Biotechnol.* **2008**, *26*, 1367.
2. Hellman, L. M.; Fried, M. G., Electrophoretic mobility shift assay (EMSA) for detecting protein–nucleic acid interactions. *Nat. Protoc.* **2007**, *2*, 1849.

**Table S1.** A list of candidate  $O^2$ -*n*BudT-binding proteins identified from SILAC-based quantitative proteomic experiments. Listed are the protein ratios ( $O^2$ -*n*BudT/dT) obtained from three forward (Fwd) and three reverse (Rvs) SILAC labeling experiments. “NaN” indicates that the protein was not quantified in the specific experiment.

| Protein Names                                            | Gene Names | Ratio Fwd-1 | Ratio Fwd-2 | Ratio Fwd-3 | Ratio Rvs-1 | Ratio Rvs-2 | Ratio Rvs-3 | Ave. Ratio | S.D. |
|----------------------------------------------------------|------------|-------------|-------------|-------------|-------------|-------------|-------------|------------|------|
| Nucleolar and coiled-body phosphoprotein 1               | NOLC1      | NaN         | 4.8         | 4.4         | NaN         | 2.8         | NaN         | 4.0        | 1.1  |
| RNA-binding protein FUS                                  | FUS        | NaN         | 4.3         | NaN         | 2.7         | NaN         | NaN         | 3.5        | 1.1  |
| TATA-box-binding protein                                 | TBP        | 3.3         | NaN         | NaN         | NaN         | 2.0         | NaN         | 2.7        | 0.9  |
| Nuclear cap-binding protein subunit 1                    | NCBP1      | 3.0         | 2.5         | 2.4         | 3.9         | 2.3         | 1.7         | 2.7        | 0.7  |
| THO complex subunit 2                                    | THOC2      | NaN         | 4.8         | 3.3         | 1.9         | 1.3         | 2.1         | 2.7        | 1.4  |
| Pre-mRNA-processing factor 40 homolog A                  | PRPF40A    | NaN         | 3.8         | 3.1         | 2.4         | 1.6         | 1.3         | 2.4        | 1.1  |
| Serine/arginine-rich splicing factor 6                   | SRSF6      | NaN         | 1.9         | 1.7         | NaN         | 3.6         | NaN         | 2.4        | 1.0  |
| Treacle protein                                          | TCOF1      | NaN         | 1.8         | NaN         | 3.8         | 1.3         | NaN         | 2.3        | 1.3  |
| Non-histone chromosomal protein HMG-17                   | HMGN2      | 0.8         | 4.3         | 1.3         | 2.2         | NaN         | NaN         | 2.2        | 1.6  |
| Dynamin-2                                                | DNM2       | 1.4         | 3.4         | 1.9         | 1.6         | 2.0         | 2.2         | 2.1        | 0.7  |
| DNA damage-binding protein 1                             | DDB1       | 1.8         | 2.6         | 1.3         | 2.0         | 1.5         | 2.8         | 2.0        | 0.6  |
| Sister chromatid cohesion protein PDS5 homolog A         | PDS5A      | 1.9         | 2.3         | 1.8         | 1.8         | 2.7         | 1.6         | 2.0        | 0.4  |
| E3 ubiquitin-protein ligase                              | UHRF2      | NaN         | 1.5         | 2.7         | 1.8         | NaN         | NaN         | 2.0        | 0.6  |
| Splicing factor 3B subunit 1                             | SF3B1      | 2.0         | 2.1         | 1.7         | 1.9         | 2.0         | 1.3         | 1.8        | 0.3  |
| DNA topoisomerase 1                                      | TOP1       | 1.0         | 2.6         | 1.8         | 1.7         | 1.8         | 1.9         | 1.8        | 0.5  |
| Leucine-rich PPR motif-containing protein, mitochondrial | LRPPRC     | 1.2         | 2.4         | 2.1         | 2.2         | 1.6         | 1.2         | 1.8        | 0.5  |
| DNA-dependent protein kinase catalytic subunit           | PRKDC      | NaN         | 2.1         | NaN         | NaN         | 1.6         | NaN         | 1.8        | 0.3  |

| <b>Protein Names</b>                      | <b>Gene Names</b> | <b>Ratio Fwd-1</b> | <b>Ratio Fwd-2</b> | <b>Ratio Fwd-3</b> | <b>Ratio Rvs-1</b> | <b>Ratio Rvs-2</b> | <b>Ratio Rvs-3</b> | <b>Ave. Ratio</b> | <b>S.D.</b> |
|-------------------------------------------|-------------------|--------------------|--------------------|--------------------|--------------------|--------------------|--------------------|-------------------|-------------|
| DNA damage-binding protein 2              | DDB2              | 2.5                | 1.6                | 1.4                | 1.9                | 1.5                | NaN                | 1.8               | 0.4         |
| RNA-binding protein 25                    | RBM25             | NaN                | 1.5                | NaN                | NaN                | 2.2                | 1.5                | 1.7               | 0.4         |
| Heterogeneous nuclear ribonucleoprotein F | HNRNPF            | 1.9                | 1.9                | 1.4                | 2.3                | 0.9                | 1.3                | 1.6               | 0.5         |
| DNA mismatch repair protein Msh6          | MSH6              | NaN                | 1.5                | 1.7                | NaN                | 1.7                | 1.6                | 1.6               | 0.1         |

**Table S2.** A list of candidate  $O^4$ -*n*BudT-binding proteins. Listed are the protein ratios ( $O^4$ -*n*BudT/dT) obtained from three forward (Fwd) and three reverse (Rvs) SILAC labeling experiments. “NaN” indicates that the protein was not quantified in the specific experiment.

| Protein Names                                                                     | Gene Names | Ratio Fwd-1 | Ratio Fwd-2 | Ratio Fwd-3 | Ratio Rvs-1 | Ratio Rvs-2 | Ratio Rvs-3 | Ave. Ratio | S.D. |
|-----------------------------------------------------------------------------------|------------|-------------|-------------|-------------|-------------|-------------|-------------|------------|------|
| Transcription factor A, mitochondrial                                             | TFAM       | 3.7         | 4.5         | 4.6         | 17.9        | 5.6         | 6.7         | 7.2        | 5.4  |
| Spectrin beta chain, non-erythrocytic 5                                           | SPTBN5     | 0           | 0           | 18.7        | 7.6         | 2.8         | 12.7        | 7.0        | 7.5  |
| Thymocyte nuclear protein 1                                                       | THYN1      | NaN         | NaN         | 4.6         | 6.3         | 3.7         | 4.0         | 4.7        | 1.2  |
| Serine/threonine-protein phosphatase 2A 65 kDa regulatory subunit A alpha isoform | PPP2R1A    | NaN         | 4.6         | 5.4         | 6.2         | 1.9         | NaN         | 4.5        | 1.9  |
| 60S ribosomal protein L34                                                         | RPL34      | 2.6         | 1.0         | 2.2         | 18.6        | 1.8         | 0.9         | 4.5        | 6.9  |
| 60S ribosomal protein L23a                                                        | RPL23A     | 3.4         | 1.0         | 1.4         | 17.6        | 2.6         | 1.0         | 4.5        | 6.5  |
| DNA replication licensing factor MCM5                                             | MCM5       | NaN         | 1.7         | 2.3         | 10.7        | NaN         | 1.3         | 4.0        | 4.5  |
| High mobility group protein B1                                                    | HMGB1      | 4.7         | 3.0         | 4.8         | 2.4         | 2.0         | 5.0         | 3.7        | 1.3  |
| NADH dehydrogenase [ubiquinone] 1 beta subcomplex subunit 6                       | NDUFB6     | NaN         | NaN         | 1.7         | 9.5         | 1.9         | 0.9         | 3.5        | 4.0  |
| 60S ribosomal protein L37a                                                        | RPL37A     | 2.8         | 1.0         | 2.1         | 12.2        | 1.9         | 0.9         | 3.5        | 4.3  |
| Sister chromatid cohesion protein PDS5 homolog A                                  | PDS5A      | 4.6         | 2.7         | 6.2         | 2.7         | 1.0         | 2.8         | 3.4        | 1.8  |
| Myosin light chain 1/3, skeletal muscle isoform                                   | MYL1       | 4.5         | NaN         | 1.8         | 8.1         | 1.7         | 0.7         | 3.4        | 3.0  |
| 60S ribosomal protein L4                                                          | RPL4       | 3.9         | 1.6         | 2.5         | 8.1         | 2.0         | 1.2         | 3.2        | 2.6  |
| Voltage-dependent anion-selective channel protein 1                               | VDAC1      | NaN         | 1.1         | 3.0         | 9.1         | 1.5         | 0.8         | 3.1        | 3.5  |
| THO complex subunit 2                                                             | THOC2      | 1.0         | 3.6         | 5.9         | 3.5         | 2.3         | 2.0         | 3.0        | 1.7  |
| Receptor of activated protein C kinase 1                                          | RACK1      | NaN         | 3.1         | 3.3         | NaN         | NaN         | 2.4         | 3.0        | 0.5  |
| 40S ribosomal protein S6                                                          | RPS6       | 4.8         | 1.2         | 2.4         | 5.9         | 2.4         | 1.2         | 3.0        | 2.0  |
| Cytochrome b-c1 complex subunit 6, mitochondrial                                  | UQCRH      | NaN         | 7.1         | 2.2         | 3.1         | 1.3         | 1.0         | 2.9        | 2.5  |



| <b>Protein Names</b>                                                       | <b>Gene Names</b> | <b>Ratio Fwd-1</b> | <b>Ratio Fwd-2</b> | <b>Ratio Fwd-3</b> | <b>Ratio Rvs-1</b> | <b>Ratio Rvs-2</b> | <b>Ratio Rvs-3</b> | <b>Ave. Ratio</b> | <b>S.D.</b> |
|----------------------------------------------------------------------------|-------------------|--------------------|--------------------|--------------------|--------------------|--------------------|--------------------|-------------------|-------------|
| Serine/arginine-rich-splicing factor 11                                    | SRSF11            | NaN                | 2.1                | 3.0                | 6.6                | 1.3                | 1.7                | 2.9               | 2.1         |
| Cullin-associated NEDD8-dissociated protein 1                              | CAND1             | NaN                | 2.3                | 1.3                | 3.1                | NaN                | 4.8                | 2.9               | 1.5         |
| HUMAN TATA-binding protein-associated factor 2N                            | TAF15             | 1.7                | 6.9                | 1.6                | 3.3                | 1.7                | 1.7                | 2.8               | 2.1         |
| Serine/threonine-protein kinase                                            | VRK1              | 1.9                | 1.2                | 3.7                | 5.7                | 1.5                | NaN                | 2.8               | 1.9         |
| ATP synthase subunit alpha, mitochondrial                                  | ATP5F1A           | NaN                | 1.9                | 1.1                | 9.4                | 0.7                | 0.9                | 2.8               | 3.7         |
| 60S ribosomal protein L8                                                   | RPL8              | 2.3                | 1.2                | 2.3                | 6.3                | 3.4                | 1.2                | 2.8               | 1.9         |
| NADH dehydrogenase [ubiquinone] 1 beta subcomplex subunit 8, mitochondrial | NDUFB8            | 4.5                | NaN                | 1.5                | 4.4                | 1.2                | 1.9                | 2.7               | 1.6         |
| Inhibitor of growth protein                                                | ING1              | 3.2                | 0.6                | 1.6                | 7.7                | 2.0                | 1.1                | 2.7               | 2.6         |
| Regulation of nuclear pre-mRNA domain-containing protein 2                 | RPRD2             | NaN                | 3.0                | NaN                | 3.6                | 1.4                | NaN                | 2.6               | 1.1         |
| Gamma-tubulin complex component                                            | TUBGC2            | NaN                | 1.9                | NaN                | 4.3                | 1.6                | NaN                | 2.6               | 1.5         |
| Ras-related protein Rab-1B                                                 | RAB1B             | NaN                | 2.6                | NaN                | 2.4                | NaN                | NaN                | 2.5               | 0.1         |
| DNA topoisomerase 1                                                        | TOP1              | 3.4                | 1.0                | 2.6                | 4.5                | 2.0                | 1.3                | 2.5               | 1.3         |
| Proliferation marker protein Ki-67                                         | MKI67             | 2.7                | 1.6                | 1.7                | 4.3                | 3.2                | 1.2                | 2.5               | 1.2         |
| Pre-mRNA-processing factor 40 homolog A                                    | PRPF40A           | NaN                | 3.2                | 2.9                | NaN                | 1.3                | 2.1                | 2.4               | 0.9         |
| Histone H3                                                                 | HIST2H3PS2        | 4.3                | NaN                | NaN                | 3.8                | 0.8                | 0.7                | 2.4               | 2.0         |
| Ubiquitin-associated protein 2-like                                        | UBAP2L            | 3.1                | NaN                | 0.7                | 3.5                | 1.3                | 3.5                | 2.4               | 1.4         |
| Luc7-like protein 3                                                        | LUC7L3            | NaN                | 2.9                | NaN                | 2.6                | 1.3                | NaN                | 2.3               | 0.8         |
| Talin-1                                                                    | TLN1              | NaN                | 2.9                | NaN                | 3.6                | 0.6                | NaN                | 2.3               | 1.6         |
| T-complex protein 1 subunit delta                                          | CCT4              | NaN                | 2.8                | NaN                | 1.8                | NaN                | NaN                | 2.3               | 0.7         |
| Tyrosine-protein kinase BAZ1B                                              | BAZ1B             | NaN                | 1.0                | 2.5                | 4.6                | 0.8                | 2.7                | 2.3               | 1.5         |

| <b>Protein Names</b>                                      | <b>Gene Names</b> | <b>Ratio Fwd-1</b> | <b>Ratio Fwd-2</b> | <b>Ratio Fwd-3</b> | <b>Ratio Rvs-1</b> | <b>Ratio Rvs-2</b> | <b>Ratio Rvs-3</b> | <b>Ave. Ratio</b> | <b>S.D.</b> |
|-----------------------------------------------------------|-------------------|--------------------|--------------------|--------------------|--------------------|--------------------|--------------------|-------------------|-------------|
| ATP synthase subunit d, mitochondrial                     | ATP5H             | NaN                | 0.7                | 4.1                | 4.8                | 0.7                | 1.1                | 2.3               | 2.0         |
| High mobility group protein B2                            | HMGB2             | 2.7                | NaN                | 1.3                | 1.3                | NaN                | 3.8                | 2.3               | 1.2         |
| Transformer-2 protein homolog beta                        | TRA2B             | NaN                | 2.6                | NaN                | 1.8                | NaN                | NaN                | 2.2               | 0.6         |
| ATP synthase subunit beta, mitochondrial                  | ATP5F1B           | NaN                | 2.5                | NaN                | 1.8                | NaN                | NaN                | 2.2               | 0.6         |
| Y-box-binding protein 3                                   | YBX3              | 2.1                | NaN                | NaN                | NaN                | NaN                | 2.3                | 2.2               | 0.1         |
| 60S ribosomal protein L14                                 | RPL14             | 2.8                | 1.0                | 2.4                | 4.0                | 2.1                | 1.1                | 2.2               | 1.1         |
| Ribosomal L1 domain-containing protein 1                  | RSL1D1            | 2.2                | 0.9                | 2.4                | 4.1                | 2.4                | 1.1                | 2.2               | 1.2         |
| Condensin complex subunit 1                               | NCAPD2            | NaN                | 2.5                | NaN                | 5.2                | 0.3                | 0.4                | 2.1               | 2.3         |
| CDGSH iron-sulfur domain-containing protein 1             | CISD1             | NaN                | NaN                | 2.3                | 4.0                | 1.0                | 1.1                | 2.1               | 1.4         |
| Guanine nucleotide-binding protein-like 3                 | GNL3              | NaN                | 3.3                | 1.3                | 2.6                | 1.0                | 2.2                | 2.1               | 0.9         |
| RNA cytidine acetyltransferase                            | NAT10             | NaN                | 2.7                | 2.4                | 1.7                | 1.6                | 2.2                | 2.1               | 0.5         |
| 60S ribosomal protein L18a                                | RPL18A            | 2.5                | 1.2                | 1.9                | 3.9                | 1.8                | 1.0                | 2.1               | 1           |
| Nucleolar protein 14                                      | NOP14             | 1.5                | NaN                | NaN                | 1.8                | 2.8                | 2.1                | 2.1               | 0.6         |
| Homeobox protein OTX1                                     | OTX1              | NaN                | 2.0                | 2.4                | 2.9                | 0.8                | NaN                | 2.0               | 0.9         |
| cAMP-responsive element modulator                         | CREM              | 1.3                | 1.6                | 2.2                | 4.2                | 1.1                | 1.4                | 2.0               | 1.1         |
| Splicing factor 3B subunit 1                              | SF3B1             | 1.1                | 2.6                | 2.1                | 2.7                | 1.6                | 1.7                | 2.0               | 0.6         |
| Elongin-A                                                 | ELOA              | 1.5                | NaN                | NaN                | 2.5                | NaN                | NaN                | 2.0               | 0.6         |
| Importin subunit beta-1                                   | KPNB1             | NaN                | 2.6                | NaN                | 1.2                | 1.4                | 2.5                | 1.9               | 0.7         |
| GTPase Kras                                               | KRAS              | NaN                | 1.4                | 2.5                | 2.1                | 1.8                | 1.7                | 1.9               | 0.4         |
| Cleavage and polyadenylation-specificity factor subunit 7 | CPSF7             | NaN                | 1.7                | 2.0                | 4.1                | 0.7                | 0.9                | 1.9               | 1.4         |
| Signal recognition particle 14 kDa protein                | SRP14             | 3.8                | 0.9                | 1.1                | 3.3                | 1.5                | 1.1                | 1.9               | 1.3         |
| Protein LYRIC                                             | MTDH              | 1.5                | 1.5                | 1.6                | 3.8                | 1.5                | 1.0                | 1.8               | 1.0         |
| RRP12-like protein                                        | RRP12             | 2.3                | NaN                | NaN                | 2.3                | 1.5                | 1.0                | 1.8               | 0.7         |
| U4/U6 small nuclear ribonucleoprotein Prp3                | PRPF3             | 0.4                | 4.8                | 0.8                | 2.7                | 1.0                | 1.0                | 1.8               | 1.7         |

| <b>Protein Names</b>                                         | <b>Gene Names</b> | <b>Ratio Fwd-1</b> | <b>Ratio Fwd-2</b> | <b>Ratio Fwd-3</b> | <b>Ratio Rvs-1</b> | <b>Ratio Rvs-2</b> | <b>Ratio Rvs-3</b> | <b>Ave. Ratio</b> | <b>S.D.</b> |
|--------------------------------------------------------------|-------------------|--------------------|--------------------|--------------------|--------------------|--------------------|--------------------|-------------------|-------------|
| Annexin A1                                                   | ANXA1             | NaN                | 1.8                | NaN                | 1.2                | 3.8                | 0.5                | 1.8               | 1.4         |
| 60S ribosomal protein L9                                     | RPL9              | 1.8                | 1.0                | 1.9                | 4.1                | 1.3                | 0.9                | 1.8               | 1.2         |
| Eukaryotic translation initiation factor 4 gamma 1           | EIF4G1            | NaN                | 1.7                | 2.4                | 2.6                | 1.0                | 1.1                | 1.7               | 0.7         |
| Splicing factor U2AF 65 kDa subunit                          | U2AF2             | 1.6                | 1.4                | 1.6                | 2.4                | 1.5                | 1.8                | 1.7               | 0.3         |
| Poly(rC)-binding protein 2                                   | PCBP2             | 1.4                | 1.9                | 2.3                | 2.2                | 0.9                | 1.7                | 1.7               | 0.5         |
| Peptidyl-tRNA hydrolase 2, mitochondrial                     | PTRH2             | NaN                | 1.2                | 2.3                | 3.6                | 1.0                | 0.7                | 1.7               | 1.2         |
| ATP-binding cassette sub-family F member 1                   | ABCF1             | NaN                | 1.5                | 1.9                | 1.8                | NaN                | NaN                | 1.7               | 0.2         |
| Nuclear pore glycoprotein p62                                | NUP62             | NaN                | 1.7                | NaN                | 2.7                | 0.7                | NaN                | 1.7               | 1.0         |
| TAR DNA-binding protein 43                                   | TARDBP            | NaN                | 2.3                | 1.0                | 3.5                | 0.9                | 1.0                | 1.7               | 1.1         |
| General transcription factor IIF subunit 1                   | GTF2F1            | NaN                | NaN                | 1.6                | NaN                | 1.8                | NaN                | 1.7               | 0.1         |
| NADH-ubiquinone oxidoreductase 75 kDa subunit, mitochondrial | NDUFS1            | NaN                | 0.9                | 2.2                | 1.6                | NaN                | NaN                | 1.6               | 0.6         |
| 2,3-cyclic-nucleotide 3-phosphodiesterase                    | CNP               | NaN                | 1.3                | 1.7                | NaN                | 1.6                | NaN                | 1.5               | 0.2         |

**Figure S1.** Negative-ion ESI-MS and MS/MS for the characterizations of d(ATGGCGXGCTATGATCCTAT), X =  $O^2$ -*n*BudT: (a) Negative-ion ESI-MS; (b) the product-ion spectrum of the  $[M-6H]^{6-}$  ion ( $m/z$  1028.7).

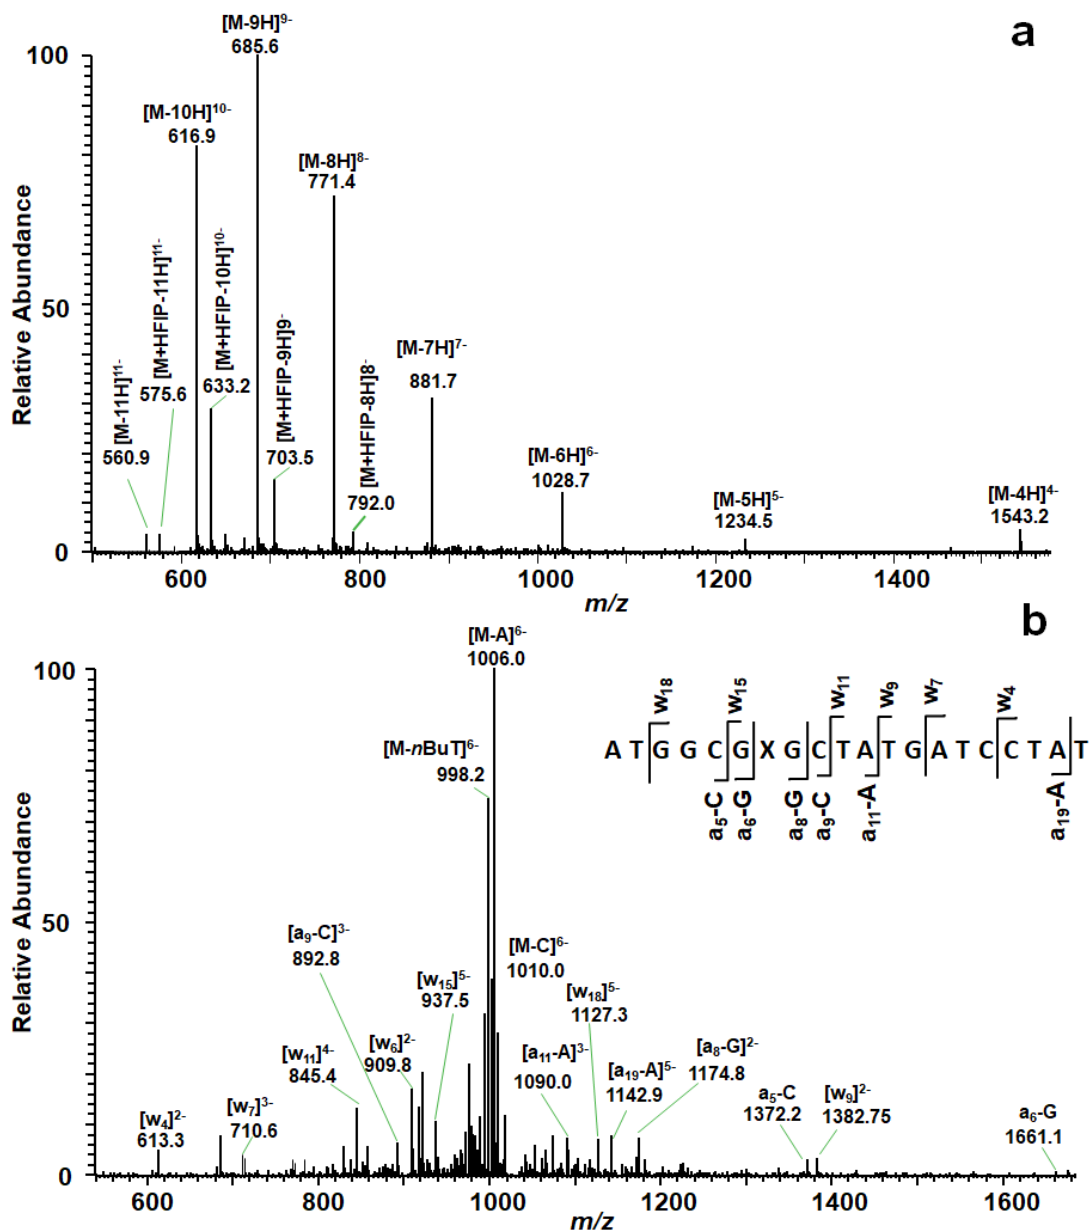

**Figure S2.** Negative-ion ESI-MS and MS/MS for the characterizations of d(ATGGCGXGCTATGATCCTAT), X =  $O^4$ -*n*BudT: (a) Negative-ion ESI-MS; (b) the product-ion spectrum of the  $[M-6H]^{6-}$  ion ( $m/z$  1028.8).

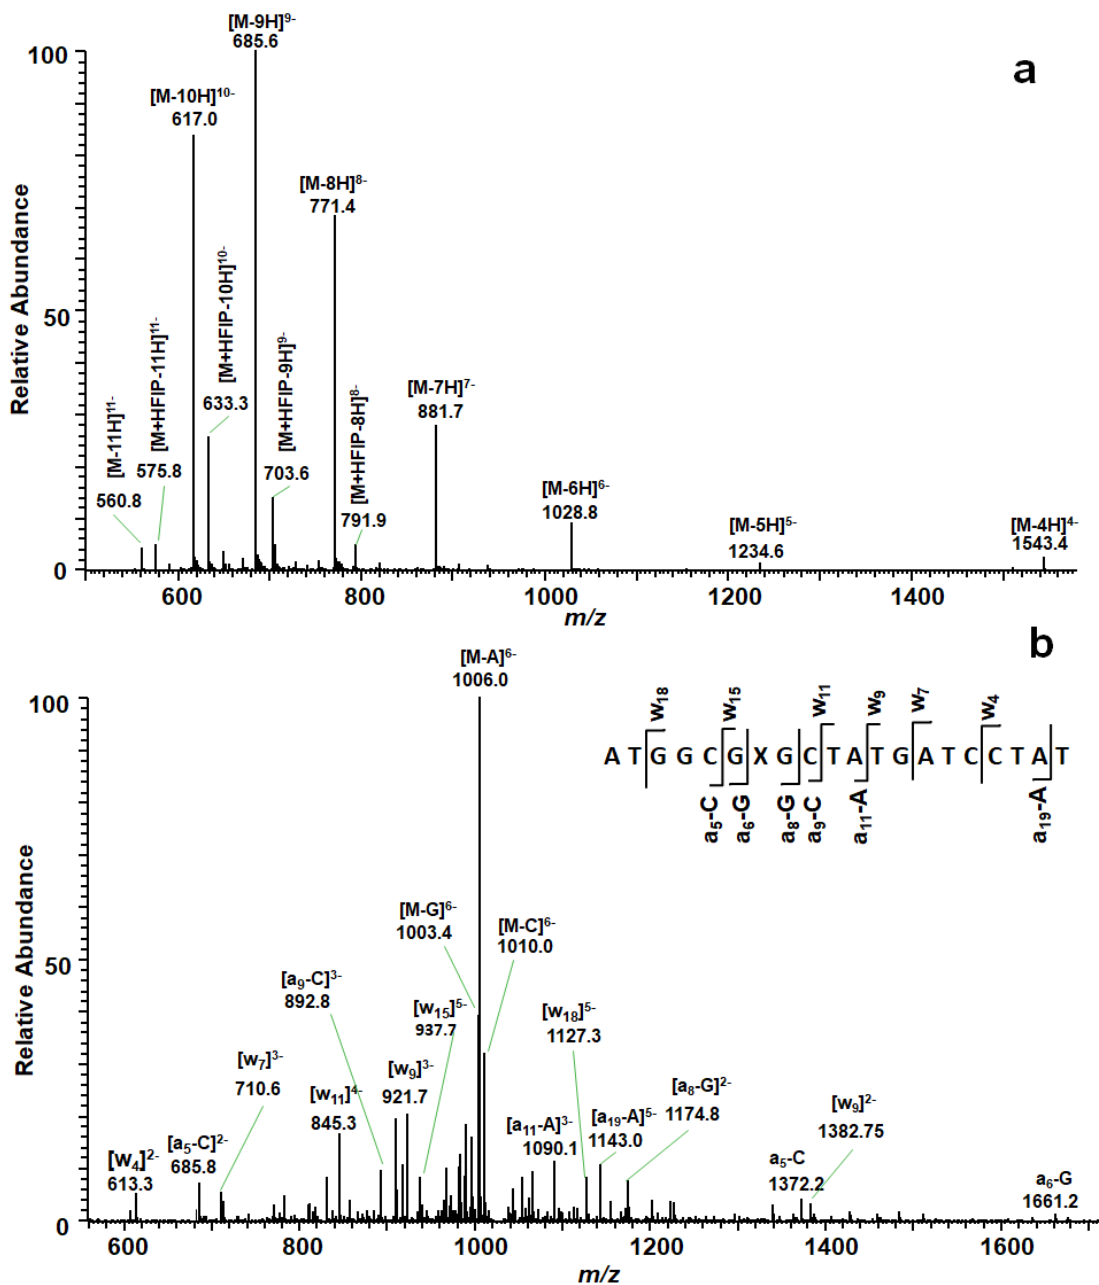

**Figure S3.** Negative-ion ESI-MS and MS/MS for the characterizations of d(ATGGCGXGCTATGATCCTAT), X =  $O^4$ -POBdT: (a) Negative-ion ESI-MS; (b) the product-ion spectrum of the  $[M-6H]^{6-}$  ion ( $m/z$  1043.9).

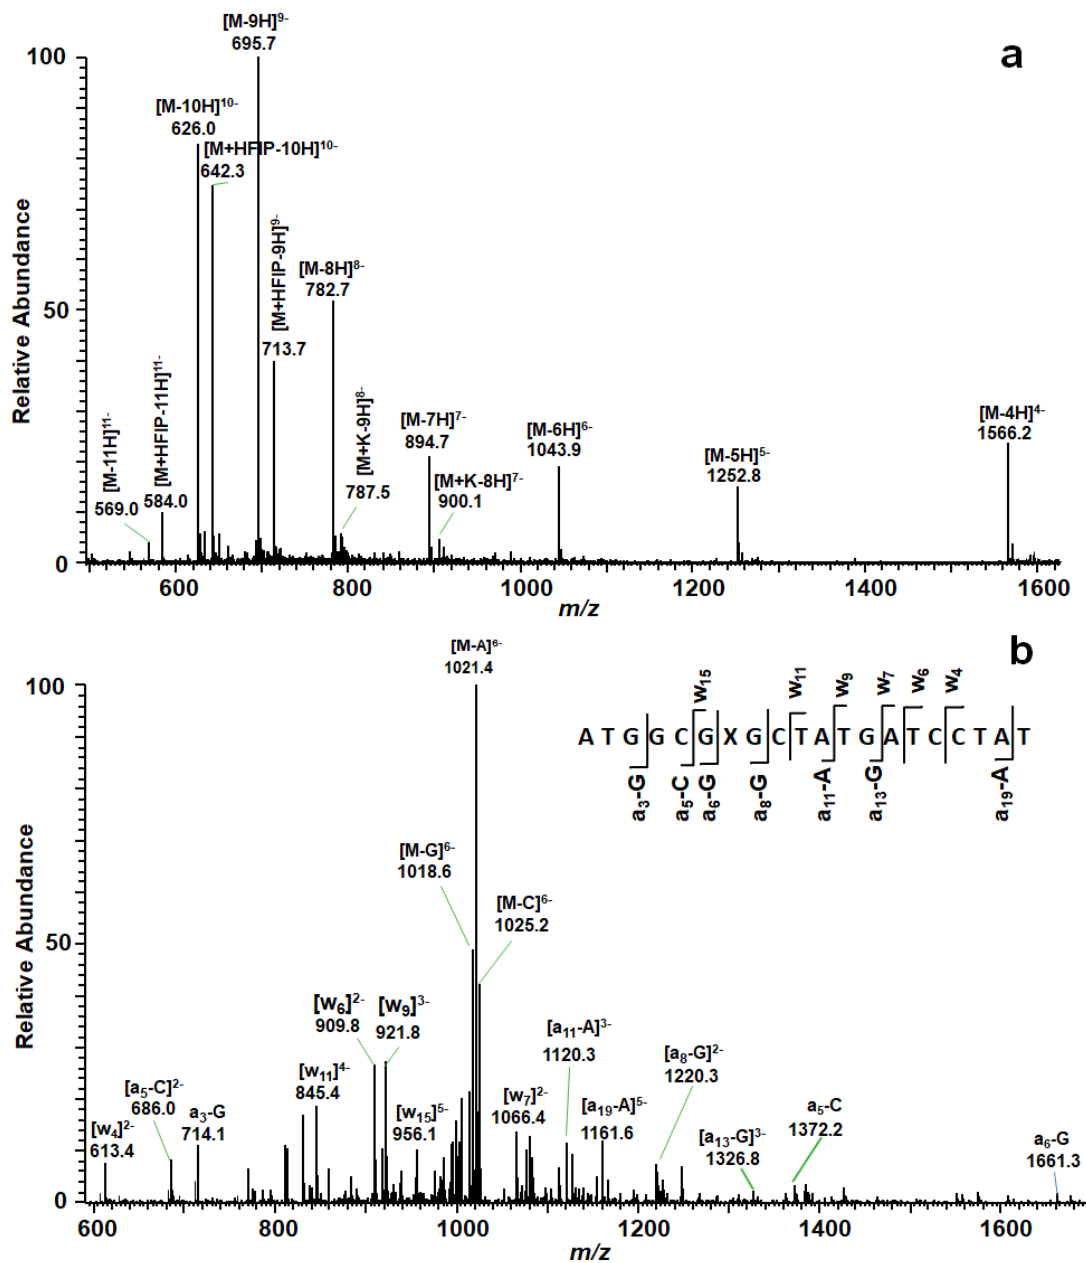

**Figure S4.** Representative PAGE gel image for assessing the purity of the synthesized oligodeoxyribonucleotides.

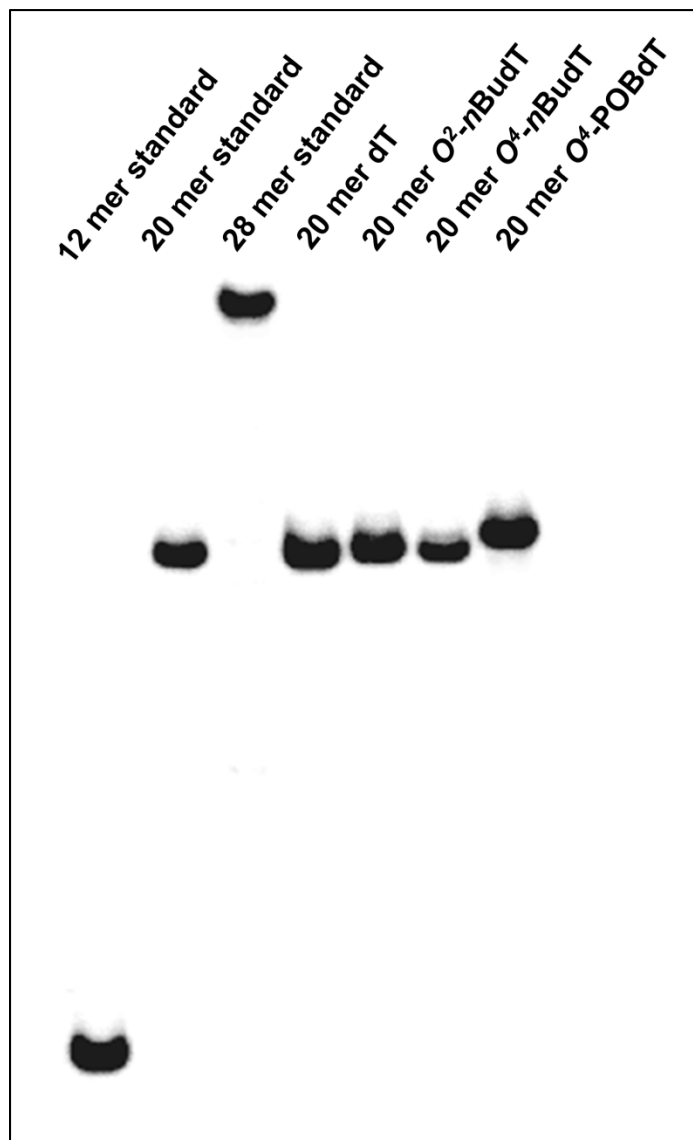

**Figure S5.** A scatter plot showing the proteins identified from pull-down assays using  $O^2$ -*n*BudT-containing DNA relative to the corresponding lesion-free DNA with nuclear protein lysates isolated from HeLa cells.

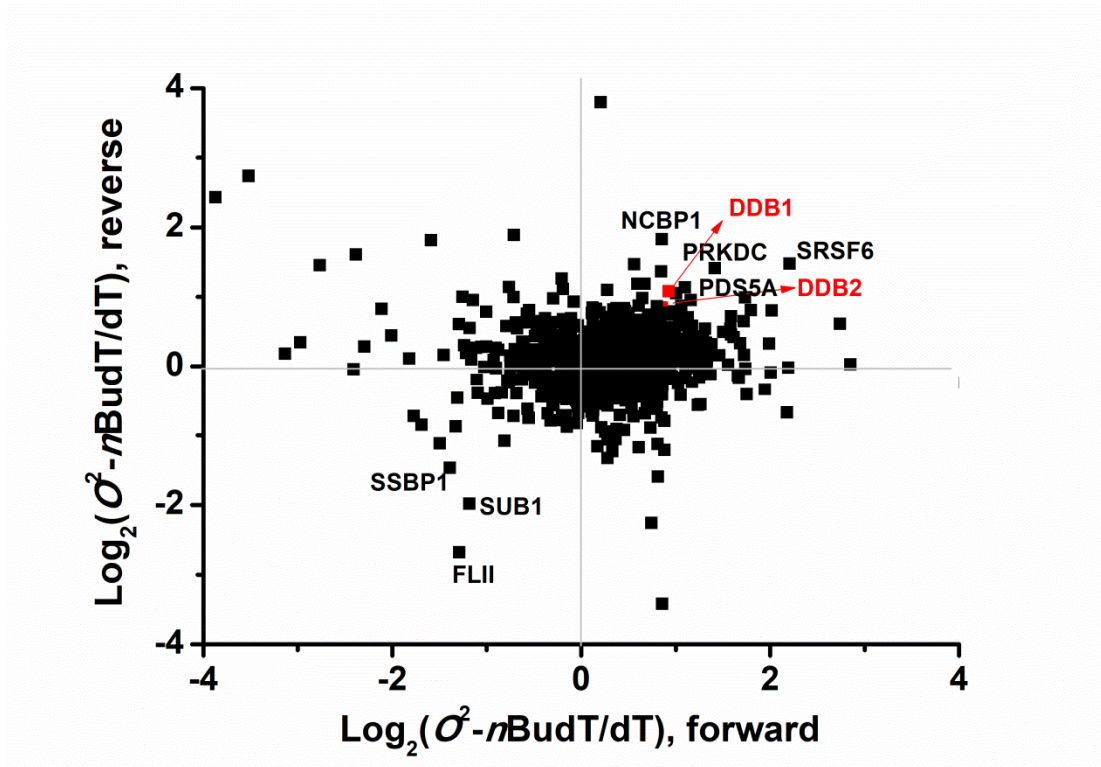



**Figure S6.** ESI-MS/MS of the  $[M + 2H]^{2+}$  ions of light (a) and heavy (b) arginine-containing peptide, EMLGGEIIPR, derived from DDB1.

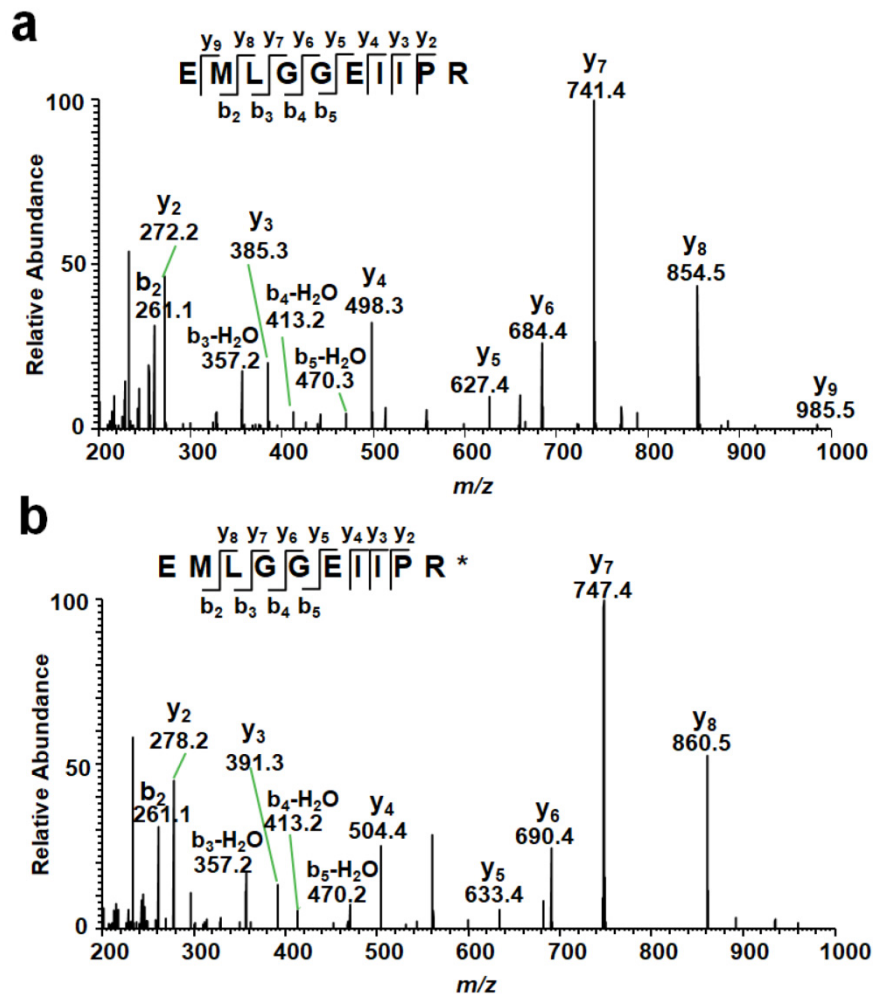

**Figure S7.** ESI-MS/MS of the  $[M + 2H]^{2+}$  ions of light (a) and heavy (b) lysine-containing peptide, FNPLNTNQFYASSMEGTTR, derived from DDB2.

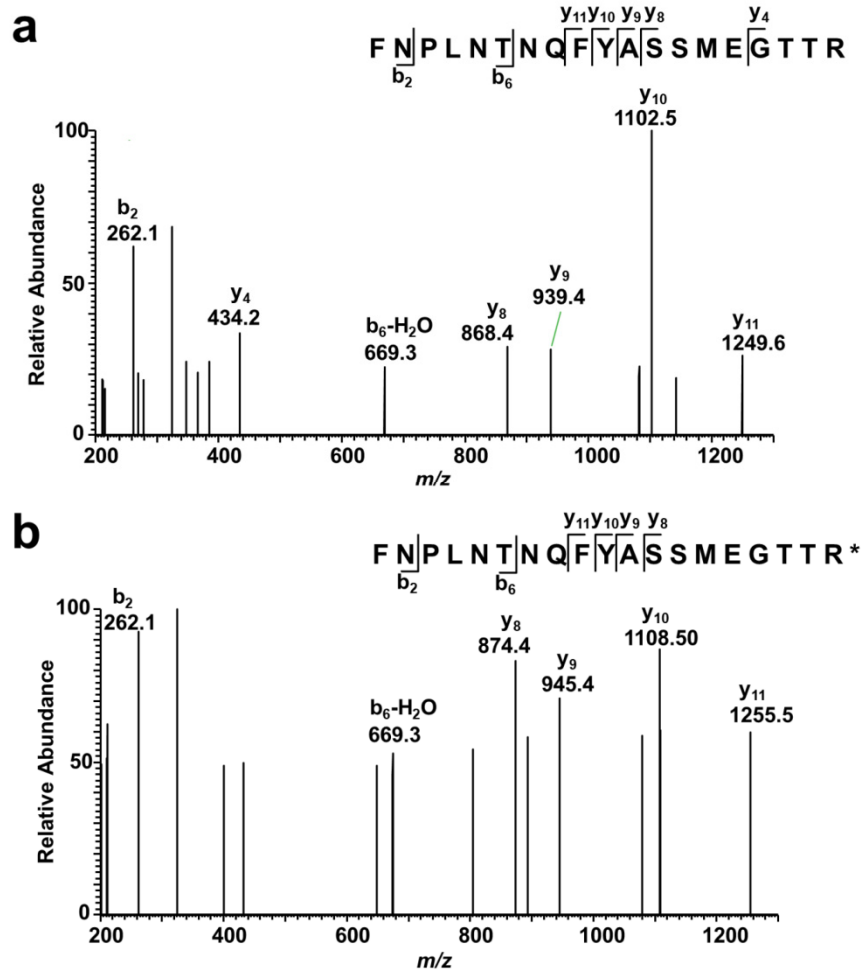

**Figure S8.** ESI-MS/MS of the  $[M + 2H]^{2+}$  ions of light (a) and heavy (b) lysine-containing peptide, FKEQLTPSQIMSLEK, derived from TFAM.

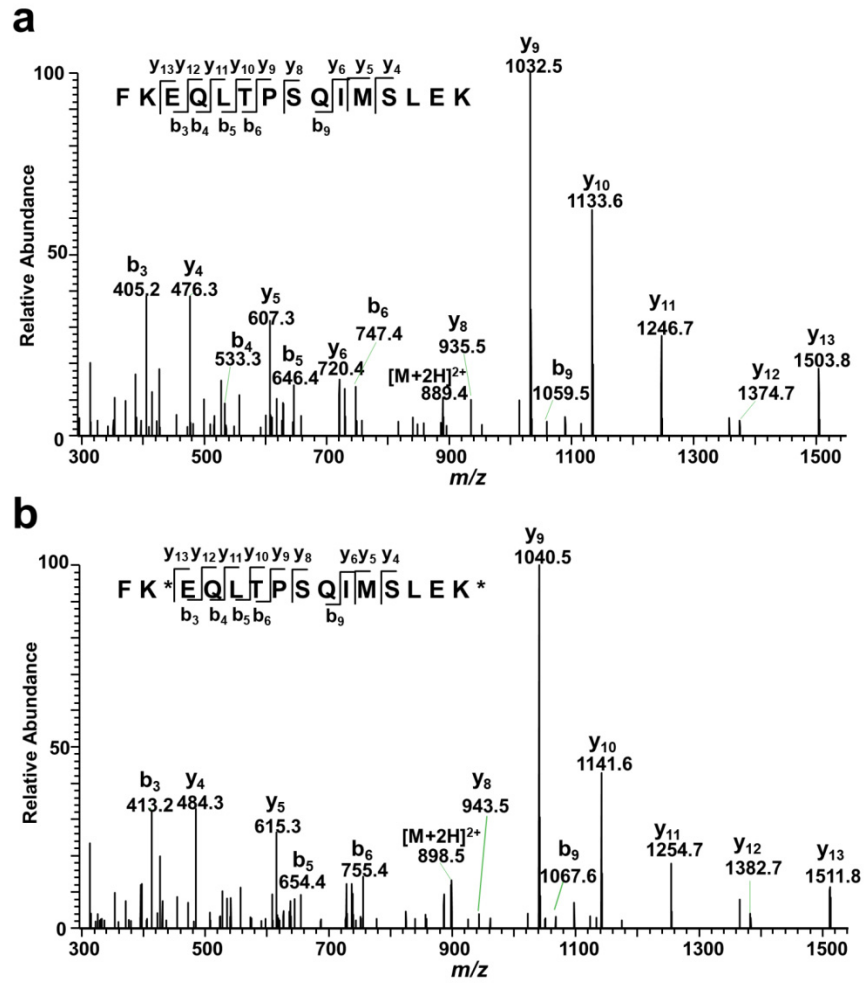

**Figure S9.** Representative ESI-MS (a, b) and ESI-MS/MS (c, d) of the  $[M + 2H]^{2+}$  ions of light and heavy arginine-containing peptide, AEWQVYK\*EEISR, derived from TFAM.

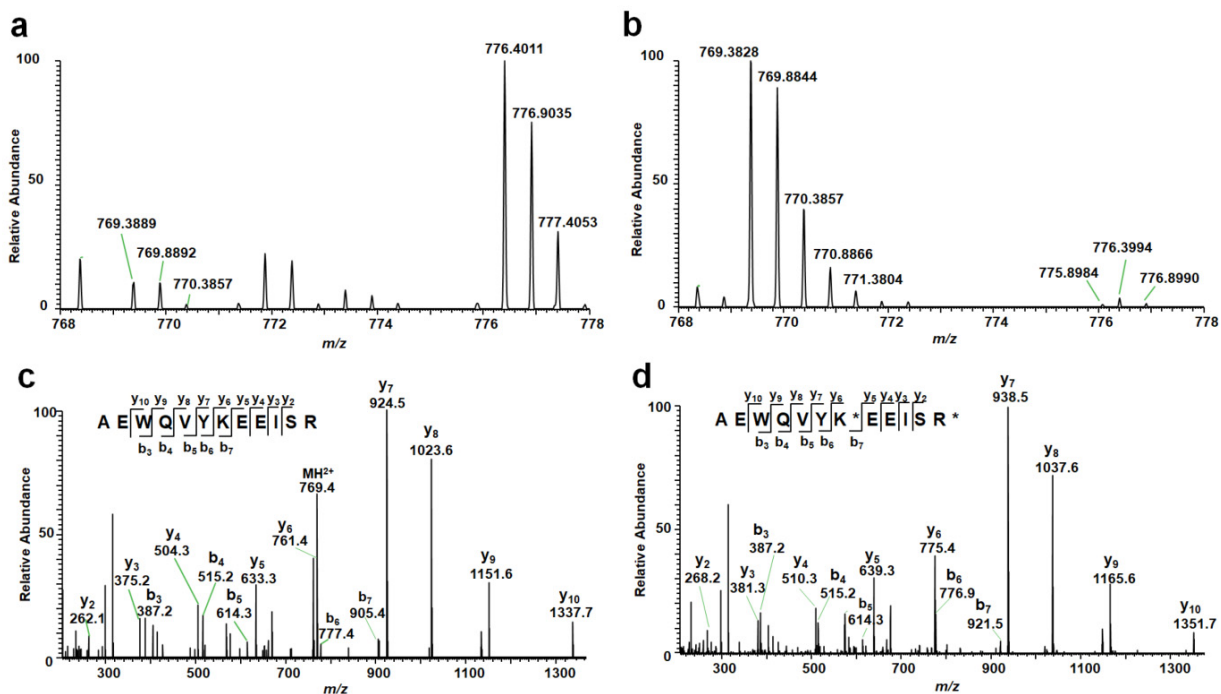

**Figure S10.** SDS-PAGE for monitoring the purification of recombinant full-length TFAM protein. The gel was stained with Coomassie blue.

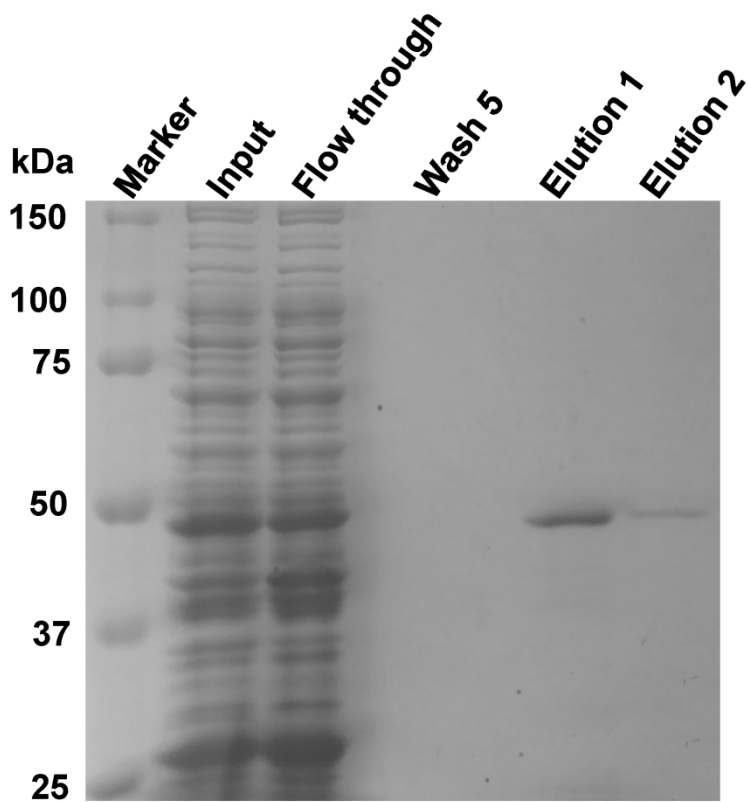

**Figure S11.** (a) A schematic diagram illustrating the domain structure of TFAM protein. (b) SDS-PAGE gel for monitoring the purifications of truncated forms of recombinant TFAM protein that contain only the HMG-box A or HMG-box B domains (i.e. TFAM-HMG-box A and TFAM-HMG-box B).

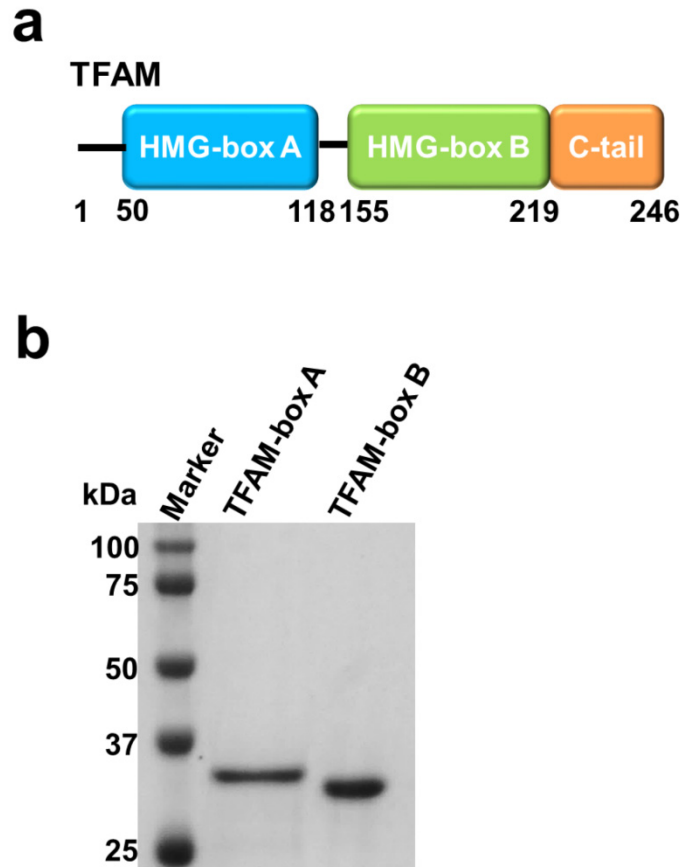

**Figure S12.** EMSA for measuring the binding affinities of HMG-box A (a) and HMG-box B (b) domains of TFAM with lesion-free and  $O^4$ -alkyldT DNA probes ( $n = 3$ ). Error bars represent S. D.

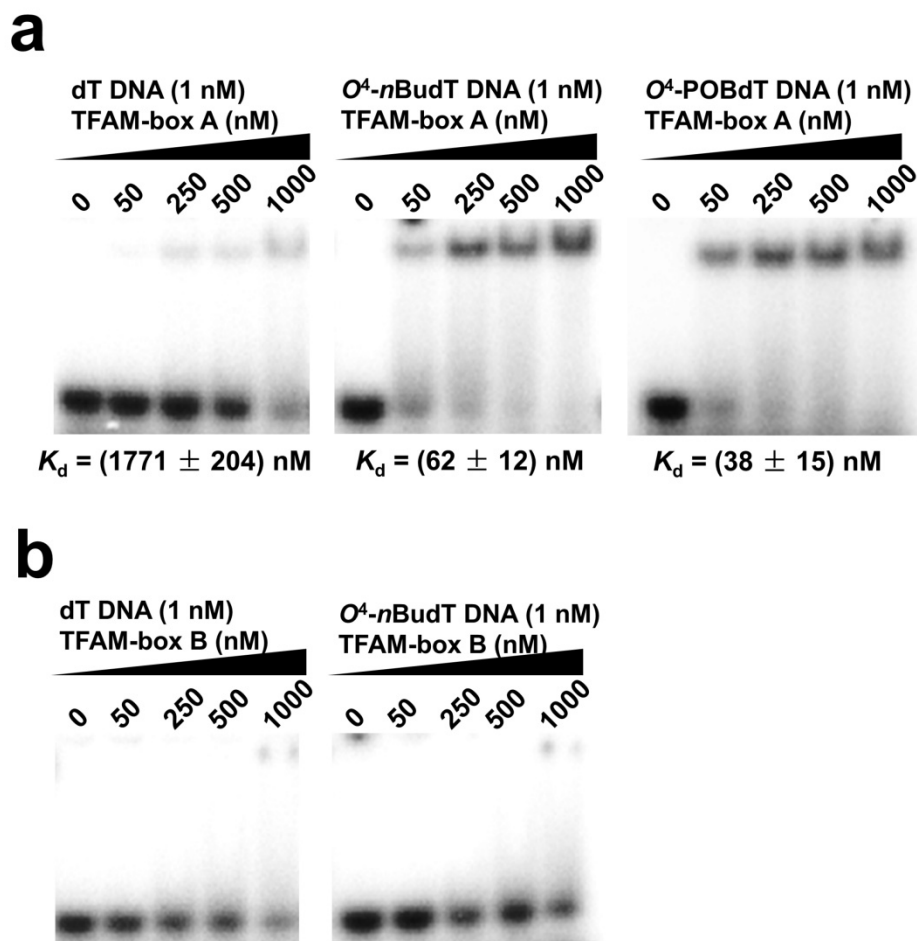

**Figure S13.** Representative ESI-MS results showing the detection of the  $[M-3H]^{3-}$  ions of restriction fragments of interest arising from the hRNAPII-mediated transcription of  $O^2$ -*n*BudT- (a, b),  $O^4$ -*n*BudT- (c) or  $O^4$ -POBdT-bearing substrates (d). ‘13mer A’ represents the non-mutagenic product, i.e., d(AATTATAGCACGC), whereas ‘13mer T’ and ‘13mer G’ designate the corresponding products carrying an A→U or A→G mutation opposite the lesion site, i.e., d(AATTATAGCTCGC) and d(AATTATAGCGCGC), respectively.

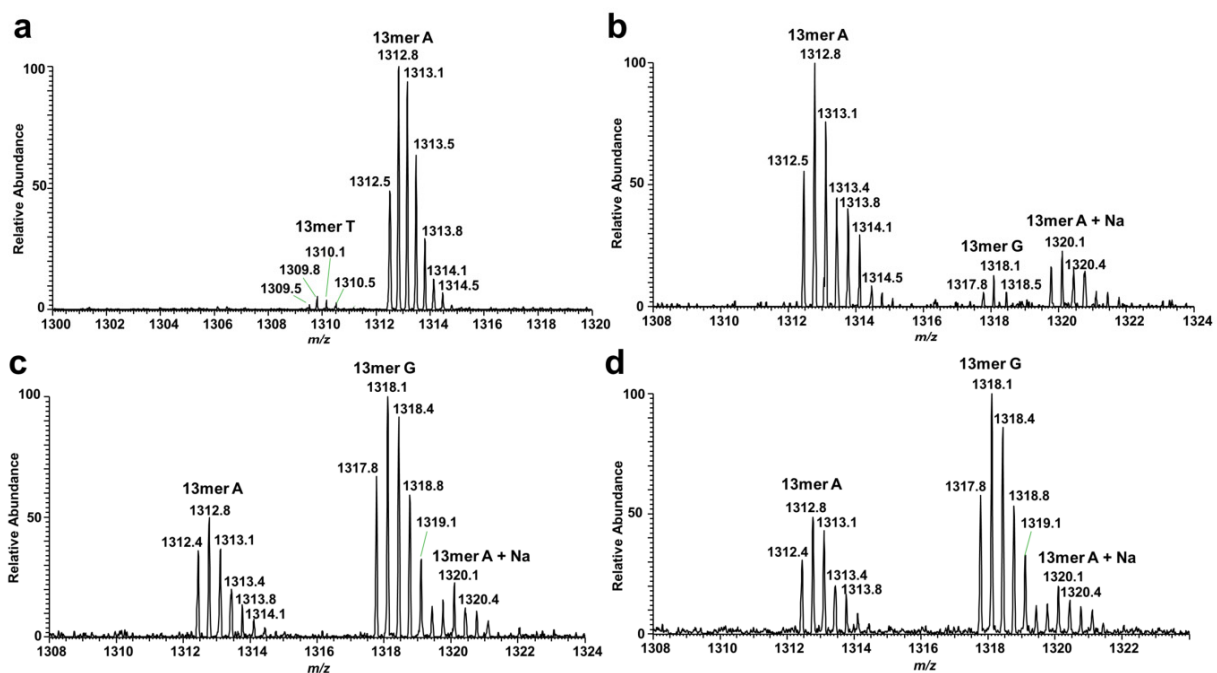



**Figure S14.** Representative ESI-MS/MS for monitoring the 13-mer restriction fragments of interest with A→U, A→G or A→C mutation opposite the original lesion sites. Shown are the MS/MS for monitoring the fragmentations of the  $[M-3H]^{3-}$  ions of (a) (AATTATAGCACGC) (non-mutagenic product,  $m/z$  1312.8), (b) d(AATTATAGCTCGC) (A→U mutation,  $m/z$  1309.8), (c) d(AATTATAGCGCGC) (A→G mutation,  $m/z$  1318.1), and (d) d(AATTATAGCCC GC) (A→C mutation,  $m/z$  1304.8), respectively.

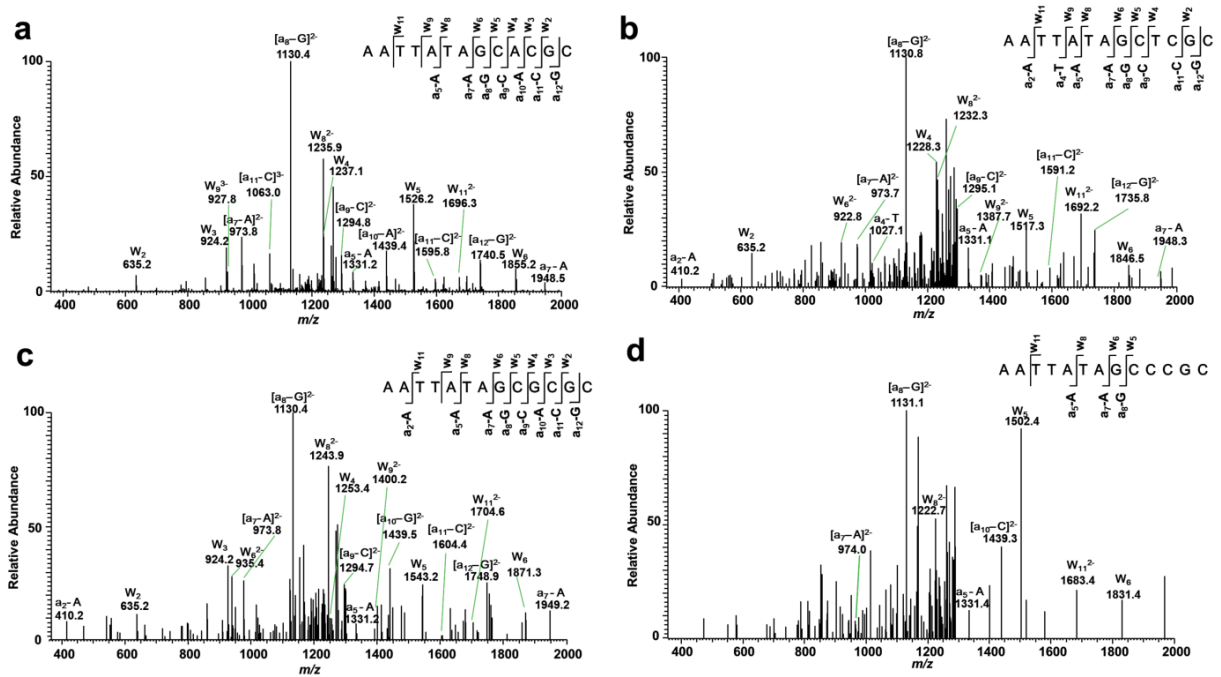

**Figure S15.** Restriction digestion and post-labeling method for determining the bypass efficiencies and mutation frequencies of  $O^2$ - $n$ BudT,  $O^4$ - $n$ BudT and  $O^4$ -POBdT in HeLa cells. (a) Representative gel image showing the NcoI/SfaNI-treated restriction fragments of interest. ‘16mer-comp’ represents the standard ODN d(CATGGCGATATGCTAT), which corresponds to the restriction fragment arising from the competitor vector; ‘13mer-C’, ‘13mer-A’, ‘13mer-G’ and ‘13mer-T’ represent the standard ODN d(CATGGCGNGCTAT), where ‘N’ is C, A, G, T, respectively. (b) Representative gel image showing the MluCI/Cac8I-treated restriction fragments of interest. ‘10mer-C’, ‘10mer-A’, ‘10mer-G’ and ‘10mer-T’ represent the standard ODN d(AATTATAGCM), where ‘M’ is C, A, G, T, respectively.

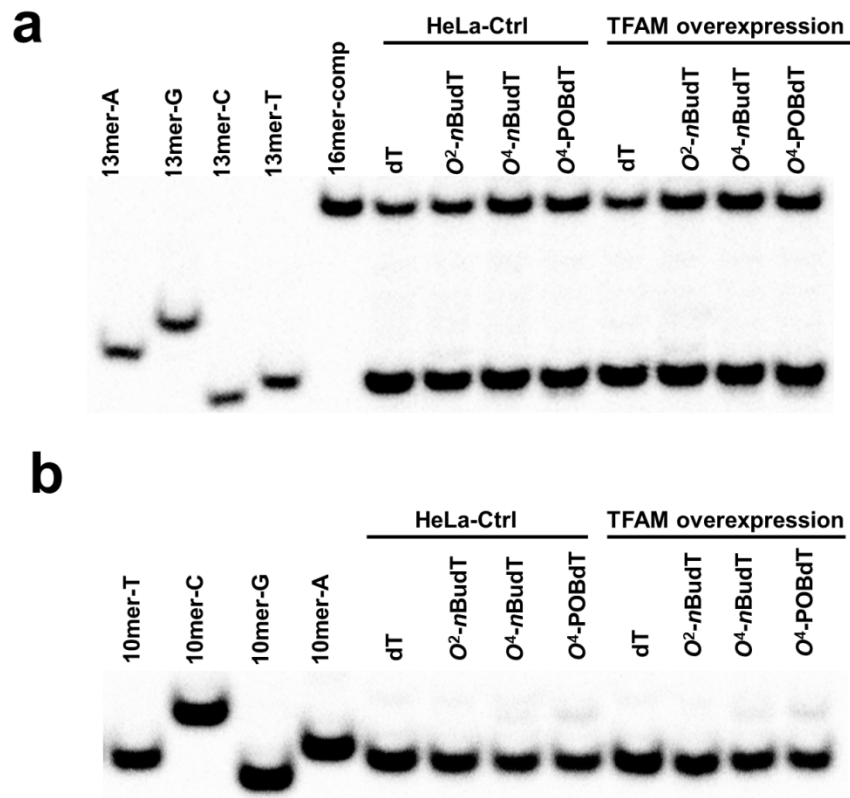

**Figure S16.** Representative ESI-MS results showing the detection of the  $[M-3H]^{3-}$  ions of restriction fragments of interest arising from *in vivo* transcription of  $O^2$ -*n*BudT- (a),  $O^4$ -*n*BudT- (b) or  $O^4$ -POBdT-bearing substrates (c). ‘13mer A’ represents the non-mutagenic product, i.e., d(AATTATAGCACGC), whereas ‘13mer T’ and ‘13mer G’ designate the corresponding products carrying an A→U, A→C or A→G mutation opposite the lesion site, i.e., d(AATTATAGCTCGC), d(AATTATAGCCCGC) and d(AATTATAGCGCGC), respectively.

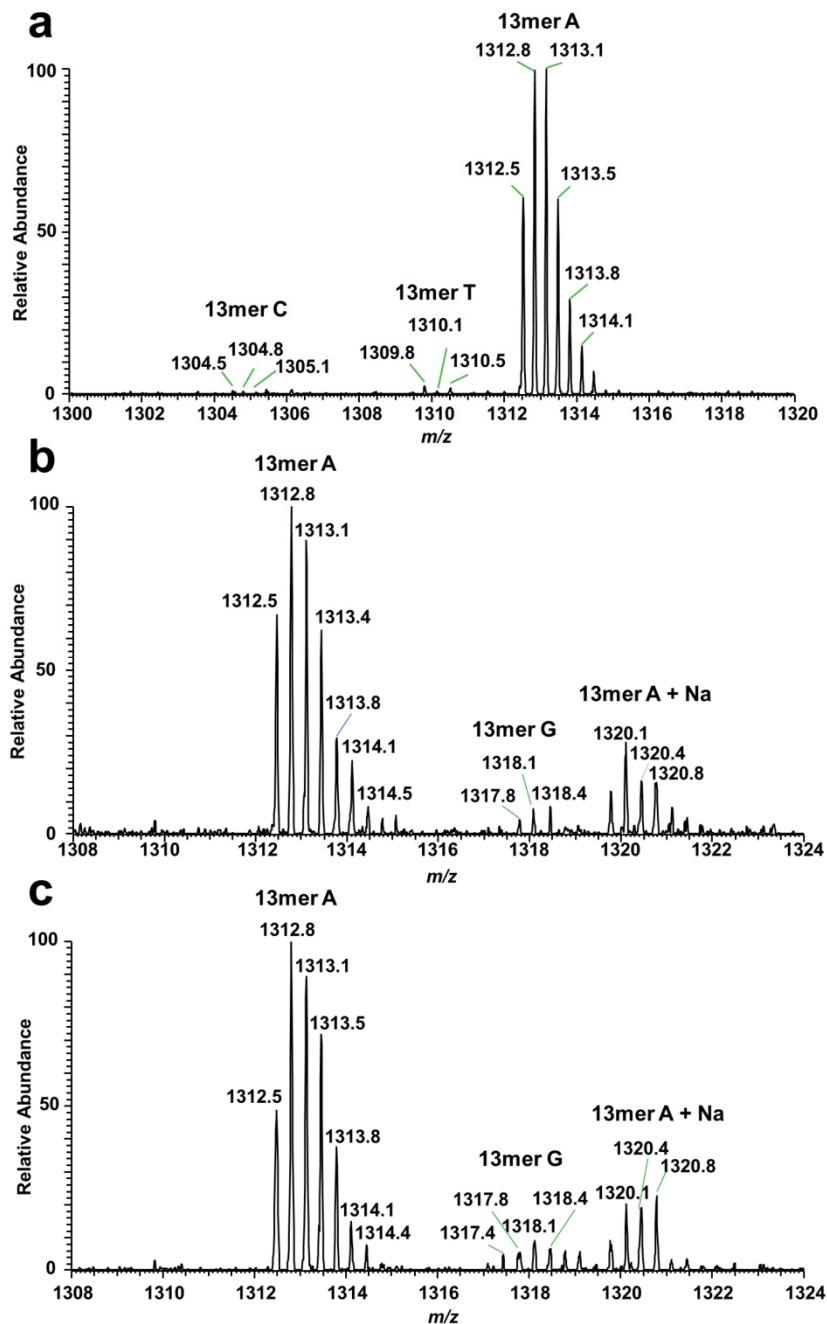

Supplement: NIHMS1668530-supplement-Supplementary_Materials.pdf [file NIHMS1668530-supplement-Supplementary_Materials.pdf]
